# Supplementary material for: Depletion, Metabolism, and Risk Assessment of Clopidol in Broilers
Source: Research Square preprint supplement (doi:10.21203/rs.3.rs-6858006/v1), 2025-07-15
Supplement: Supplementary file 1 [file 113393b6d1a059d61b169949.docx]

**Depletion, Metabolism, and Risk Assessment of Clopidol in Broilers**

Seong-Hoon Jeonga,†,Hyeong-Jin Youna,†, Ji-young Ana, Jung-Hoon Junga, Jong-Su Seoa, Min Jeong-Ranb, Sang-Hee Jeongb,*, and Jong-Hwan Kima,c,*

*a* *Environmental Safety-Assessment Center, Korea Institute of Toxicology (KIT), Jinju, 52834, Republic of Korea*

*b GLP Research Center, College of Natural Science, Hoseo University, Asan, 336795, Republic of Korea*

*cHuman and Environmental Toxicology Program, Korea University of Science and Technology (UST), Daejeon, Republic of Korea*

† Authors are equally contributed as first author

*** Corresponding authors**

**Sang-Hee Jeong**

Phone: +82-41-540-9675, Fax: +82-41-540-9829

E-mail: jeongsh@hoseo.edu

**Jong-Hwan Kim**

Phone: +82-55-750-3752, Fax: +82-55-750-3768

E-mail: jjong@kitox.re.kr


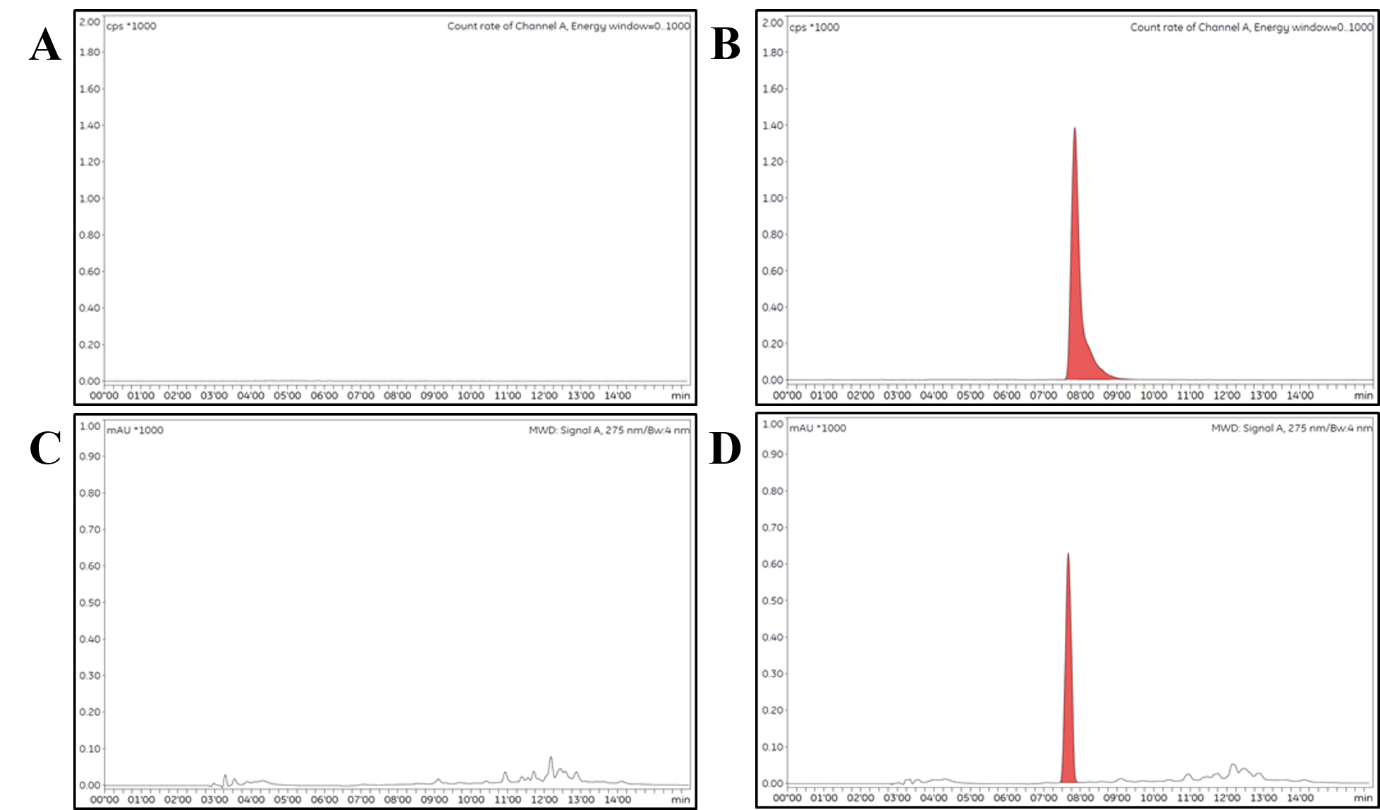


Clopidol

[3H]-clopidol

**Fig. S1** Chromatograms of [3H]-clopidol and non-labeled clopidol obtained by radio-HPLC equipped with radio (A and B) and DAD (C and D) detectors. (A) blank, (B) [3H]-clopidol, (C) blank, and (D) non-labeled clopidol

**
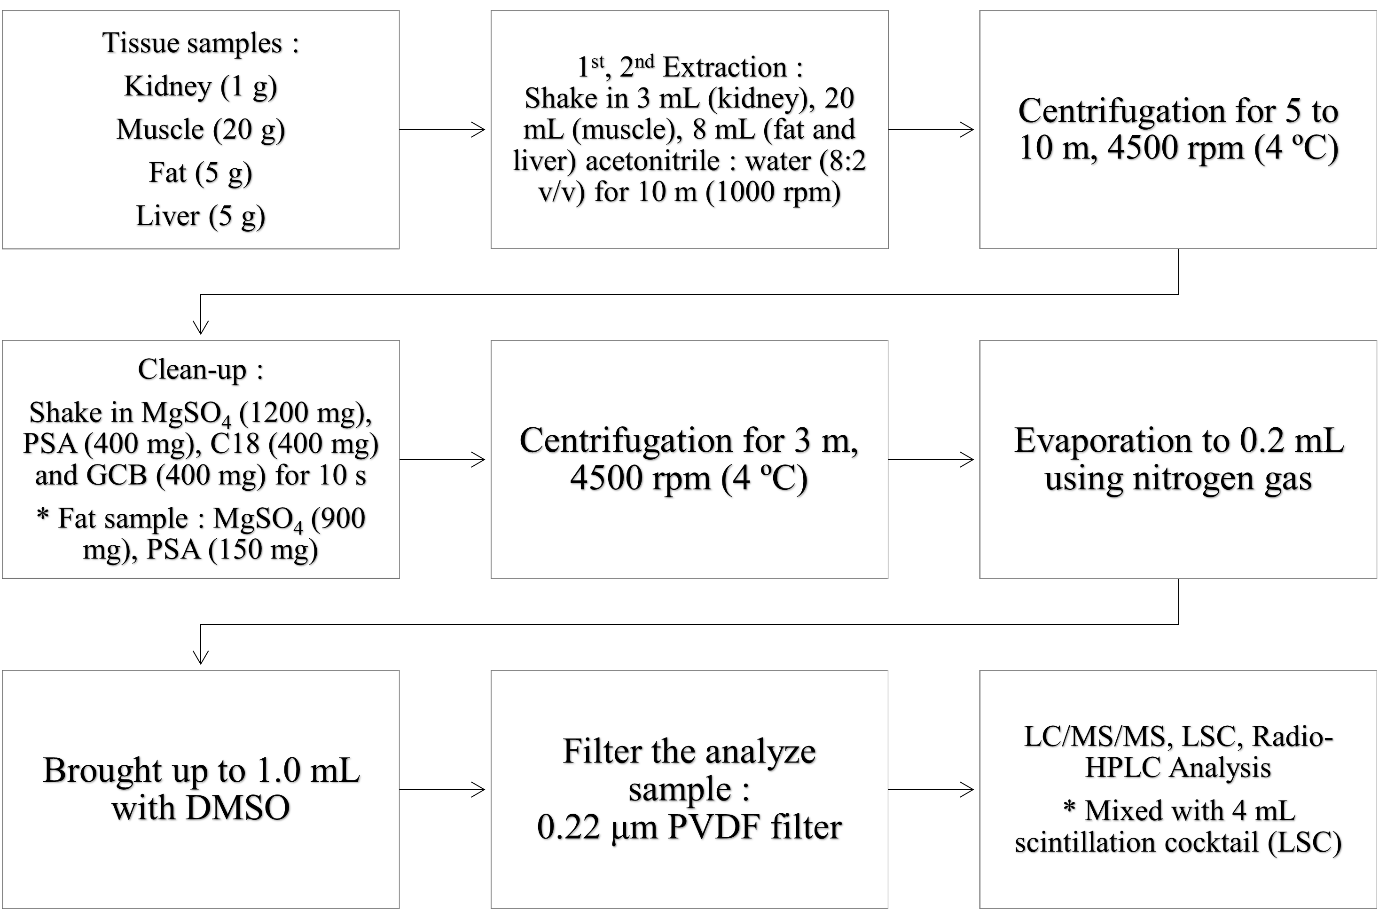
**

**Fig. S2** Sample pretreatment and extraction methods

**Table S1** Conditions of Radio-HPLC

| **Parameter** | | | | | | |
| --- | --- | --- | --- | --- | --- | --- |
| HPLC system | Agilent 1260 infinity, USA | | | | | |
| Column | Agilent, Eclipse XDB-C18, 5 μm, 4.6 x 250 mm | | | | | |
| Column temp. | 25℃ | | | | | |
| Injected volume | 300 μL | | | | | |
| Mobile phase | Solvent A: 0.05% TFA in ACN  Solvent B: 0.05% TFA in water | | | | | |
| Gradient | Time (min) | 0 | 1 | 7 | 8 | 16 |
| A (%) | 5 | 5 | 85 | 85 | 5 |
| B (%) | 95 | 95 | 15 | 15 | 95 |
| Flow rate | 1.0 mL/min | | | | | |
| Wavelength | 220 nm | | | | | |
| 3H detector | Ramona Star (ELYSIA RAYTEST, S/N: 26663)  Flow rate: 1.0 mL/min (Ultima-Flo AP scintillation cocktail) | | | | | |

**Table S2** Conditions of HPLC/LC–MS

| **Parameter** | | | | | | |
| --- | --- | --- | --- | --- | --- | --- |
| HPLC system | Agilent 1260 infinity, USA | | | | | |
| Column | Agilent, Eclipse C18, 1.8 μm, 2.1 x 100 mm | | | | | |
| Column temp. | 35℃ | | | | | |
| Injected volume | 1 μL | | | | | |
| Mobile phase | Solvent A: 0.1% formic acid in ACN  Solvent B: 0.1% formic acid in water | | | | | |
| Gradient | Time (min) | 0 | 1 | 7 | 8 | 16 |
| A (%) | 5 | 5 | 85 | 85 | 5 |
| B (%) | 95 | 95 | 15 | 15 | 95 |
| Flow rate | 1.0 mL/min | | | | | |
| MS system | Agilent Technologies 6420 Triple Quad LC/MS, USA. | | | | | |
| Ion mode | ESI, positive | | | | | |

**Table S3** LOD and LOQ of tissue extracts for LSC analysis

| **Tissues** | **Actual Concentration (**ug/kg) | |
| --- | --- | --- |
| **LOD** | **LOQ** |
| Liver | 0.62 | 2.31 |
| Kidney | 3.75 | 13.5 |
| Muscle | 0.28 | 0.95 |
| Fat | 0.68 | 2.48 |

**Table S4** Estimated daily intake of muscle (meat) and all tissues (muscle, kidney, liver, and fat) for the average (p50) and high (p90) intake groups by sex and age

| **p50 group** | EDI, muscle | | EDI, all tissues | |
| --- | --- | --- | --- | --- |
| Ages | Males | Females | Males | Females |
| 1-2y | 9.22±1.55 | 17.08±2.88 | 9.22±1.55 | 17.08±2.88 |
| 3-5y | 22.25±3.74 | 12.78±2.15 | 22.25±3.74 | 12.78±2.15 |
| 6-11y | 15.87±2.67 | 13.51±2.27 | 15.91±2.69 | 13.51±2.27 |
| 12-18y | 14.55±2.45 | 10.22±1.72 | 14.55±2.45 | 10.22±1.72 |
| 19-29y | 12.53±2.11 | 8.72±1.47 | 12.55±2.12 | 8.72±1.47 |
| 30-49y | 11.67±1.97 | 6.00±1.01 | 11.69±1.98 | 6.03±1.03 |
| 50-64y | 5.60±0.94 | 3.82±0.64 | 5.66±0.97 | 3.82±0.64 |
| 65y ≤ | 1.68±0.28 | 1.43±0.24 | 1.73±0.31 | 1.45±0.25 |

| **p90 group** | EDI, muscle | | EDI, all tissues | |
| --- | --- | --- | --- | --- |
| Ages | Males | Females | Males | Females |
| 1-2y | 25.65±4.32 | 14.98±2.52 | 25.65±4.32 | 14.98±2.52 |
| 3-5y | 35.07±5.90 | 22.81±3.84 | 35.07±5.90 | 22.81±3.84 |
| 6-11y | 21.51±3.62 | 29.09±4.90 | 21.55±3.64 | 29.09±4.90 |
| 12-18y | 24.21±4.08 | 16.98±2.86 | 24.21±4.08 | 16.98±2.86 |
| 19-29y | 25.10±4.23 | 30.42±5.12 | 25.12±4.23 | 30.42±5.12 |
| 30-49y | 20.13±3.39 | 17.17±2.89 | 20.15±3.4 | 17.20±2.91 |
| 50-64y | 8.09±1.36 | 6.23±1.05 | 8.14±1.39 | 6.23±1.05 |
| 65y ≤ | 1.16±0.20 | 1.52±0.26 | 1.21±0.22 | 1.55±0.27 |

**Table S5** Hazard quotients of muscle (meat) and all tissues (muscle, kidney, liver, and fat) for average (p50) and high (p90) intake groups by sex and age

| **p50 group** | HQ, muscle | | HQ, all tissues | |
| --- | --- | --- | --- | --- |
| Ages | Males | Females | Males | Females |
| 1-2y | 0.23±0.04 | 0.43±0.07 | 0.23±0.04 | 0.43±0.07 |
| 3-5y | 0.56±0.09 | 0.32±0.05 | 0.56±0.09 | 0.32±0.05 |
| 6-11y | 0.40±0.07 | 0.34±0.06 | 0.40±0.07 | 0.34±0.06 |
| 12-18y | 0.36±0.06 | 0.26±0.04 | 0.36±0.06 | 0.26±0.04 |
| 19-29y | 0.31±0.05 | 0.22±0.04 | 0.31±0.05 | 0.22±0.04 |
| 30-49y | 0.29±0.05 | 0.15±0.03 | 0.29±0.05 | 0.15±0.03 |
| 50-64y | 0.14±0.02 | 0.10±0.02 | 0.14±0.02 | 0.10±0.02 |
| 65y ≤ | 0.04±0.01 | 0.04±0.01 | 0.04±0.01 | 0.04±0.01 |

| **p90 group** | HQ, muscle | | HQ, all tissues | |
| --- | --- | --- | --- | --- |
| Ages | Males | Females | Males | Females |
| 1-2y | 0.64±0.11 | 0.37±0.06 | 0.64±0.11 | 0.37±0.06 |
| 3-5y | 0.88±0.15 | 0.57±0.10 | 0.88±0.15 | 0.57±0.10 |
| 6-11y | 0.54±0.09 | 0.73±0.12 | 0.54±0.09 | 0.73±0.12 |
| 12-18y | 0.61±0.10 | 0.42±0.07 | 0.61±0.10 | 0.42±0.07 |
| 19-29y | 0.63±0.11 | 0.76±0.13 | 0.63±0.11 | 0.76±0.13 |
| 30-49y | 0.50±0.08 | 0.43±0.07 | 0.50±0.09 | 0.43±0.07 |
| 50-64y | 0.20±0.03 | 0.16±0.03 | 0.20±0.03 | 0.16±0.03 |
| 65y ≤ | 0.03±0.01 | 0.04±0.01 | 0.03±0.01 | 0.04±0.01 |
